# Supplementary material for: Effectiveness of an Intervention of Dietary Counseling for Overweight and Obese Pregnant Women in the Consumption of Sugars and Energy
Source: PubMed Central journal article supplement (PMC6412784; doi:10.3390/nu11020385), 2019-02-13
Supplement: nutrients-11-00385-s001.pdf [file nutrients-11-00385-s001.pdf]

**Table S1.** Effect of the nutritional intervention on the change of consumption of total sugars and energy. Linear regression models.

|                                                                         | <b>MODEL 1</b>         | <b>P-<br/>Value</b> | <b>MODEL 2</b>         | <b>P-<br/>Value</b> | <b>MODEL 3</b>         | <b>P-<br/>Value</b> |
|-------------------------------------------------------------------------|------------------------|---------------------|------------------------|---------------------|------------------------|---------------------|
| Changes in total sugars consumption, g/day                              | -19.64 (-32.60, -6.67) | 0.003               | -15.44 (-25.04, -5.84) | 0.002               | -15.23 (-25.01, -5.46) | 0.002               |
| Change in total kilocalorie consumption, kcal/day                       | -210 (-352, -69)       | 0.004               | -126 (-239, -14)       | 0.028               | -125 (-239, -10)       | 0.032               |
| Change in total percentage of energy consumption derived from sugars, % | -1 (-3, 1)             | 0.060               | -2 (-3, -1)            | 0.001               | -2 (-3, -1)            | 0.002               |

Reference group is the control group. Figures represent  $\beta$  coefficients of the regression models and 95% confidence intervals. MODEL 1: Change in sugars/kilocalories/% calories from sugars at 35–37 weeks of pregnancy =  $\beta_0 + \beta_1$  (dietary counseling). MODEL 2: Change in sugars/kilocalories/% calories from sugars at 35–37 weeks of pregnancy =  $\beta_0 + \beta_1$  (dietary counseling) +  $\beta_2$  (sugars/kilocalories/% calories at <15 weeks of pregnancy). MODEL 3: Change in sugars/kilocalories/% calories from sugars at 35–37 weeks of pregnancy =  $\beta_0 + \beta_1$  (dietary counseling) +  $\beta_2$  (sugars/kilocalories/% calories at <15 weeks of pregnancy) +  $\beta_3$  (marital state) +  $\beta_4$  (persons in home) +  $\beta_5$  (age) +  $\beta_6$  (level of studies) +  $\beta_7$  (monthly income) +  $\beta_8$  (relation to head of household) +  $\beta_9$  (activity) +  $\beta_{10}$  (depression) +  $\beta_{11}$  (nutritional status) +  $\beta_{12}$  (gestational weight gain) +  $\beta_{13}$  (season) +  $\beta_{14}$  (health center).
